# Supplementary material
Source: Research Square preprint supplement (doi:10.21203/rs.3.rs-10078198/v1)
Supplement: Supplementary file 1 [file 0f885d73d1f7712000c89bb0.docx]

**Supplementary Table1｜**The result of mediation analyses in T2DM and non-DM population.

| Subgroup | Mediator | Total effect | P_value | Direct effect | P_value | Indirect effect | P_value | Proportion |
| --- | --- | --- | --- | --- | --- | --- | --- | --- |
| Non-DM | TC | 0.0391(0.0164-0.0637) | 0.002 | 0.0372(0.0144-0.0613) | 0.002 | 0.0019(0.0002-0.0041) | 0.032 | 4.988% |
| TG | 0.0387(0.0126-0.0627) | 0.002 | 0.0386(0.0125-0.0628) | 0.002 | 0.0002(-0.0026-0.0026) | 0.866 | 0.566% |
| HDL-C | 0.0388(0.0134-0.0620) | 0.001 | 0.0390(0.0134-0.0621) | 0.001 | -0.0002(-0.0024-0.0021) | 0.882 | 0.404% |
| LDL-C | 0.0390(0.0138-0.0635) | 0.002 | 0.0373(0.0119-0.0614) | 0.002 | 0.0017(0.0001-0.0038) | 0.048 | 4.392% |
| T2DM | TC | -0.0509(-0.1189-0.0076) | 0.096 | -0.0516(-0.1198-0.0072) | 0.096 | 0.0007(-0.0028-0.0041) | 0.698 | 1.371% |
| TG | -0.0508(-0.1132-0.0076) | 0.092 | -0.0509(-0.112-0.0076) | 0.092 | 0.0001(-0.036-0.0033) | 0.960 | 0.237% |
| HDL-C | -0.0509(-0.1182-0.0095) | 0.112 | -0.0509(-0.1124-0.0091) | 0.112 | 0.0001(-0.2643-0.2313) | 0.991 | 0.051% |
| LDL-C | -0.0509(-0.1135-0.0101) | 0.098 | -0.0519(-0.1139-0.0103) | 0.092 | 0.0010(-0.0033-0.0061) | 0.656 | 1.962% |
