# Supplementary material
Source: Research Square preprint supplement (doi:10.21203/rs.3.rs-10078198/v1)
Supplement: Supplementary file 2 [file 6df587b6a242bd795d2bf959.docx]

**Supplementary Table2｜**The result of sensitivity analysis.

|  |  | Unadjusted | | Model1 | | Model3 | |
| --- | --- | --- | --- | --- | --- | --- | --- |
| Group | OR | P_value | OR | P_value | OR | P_value |
| eGDR control levels | | | | | | | |
|  | Class 1 | REF | REF | REF | REF | REF | REF |
|  | Class 2 | 1.356(1.094-1.680) | 0.005 | 1.341(1.081-1.662) | 0.008 | 1.305(1.037-1.641) | 0.023 |
|  | Class 3 | 2.664(2.149-3.303) | 0.001 | 2.519(2.028-3.129) | 0.001 | 2.203(1.714-2.830) | 0.001 |
| Cumulative eGDR | | | | | | | |
|  | Per SD | 0.666(0.614-0.723) | 0.001 | 0.678(0.625-0.737) | 0.001 | 0.699(0.632-0.772) | 0.001 |
| Tertiles of cumulative eGDR | | | | | | | |
|  | Q3 | REF | REF | REF | REF | REF | REF |
|  | Q2 | 1.314(1.030-1.681) | 0.028 | 1.316(1.031-1.684) | 0.028 | 1.313(1.016-1.701) | 0.038 |
|  | Q1 | 2.543(2.040-3.187) | 0.001 | 2.446(1.959-3.068) | 0.001 | 2.265(1.753-2.938) | 0.001 |

Model 1: Unadjusted+Age+Gender.

Model 3: Model 1+Dyslipidemia+Currently smoking+Alcoholic+BMI+Education+ Household Register
